1 **SPATIAL RELEASE FROM INFORMATIONAL MASKING: EVIDENCE FROM**  
2 **FUNCTIONAL NEAR INFRARED SPECTROSCOPY**

3 Min Zhang, Department of Biomedical Engineering, New Jersey Institute  
4 of Technology, Newark, NJ 07102, USA. And Rutgers University, Newark, Nj  
5 07102, USA Email: [mz86@njit.edu](mailto:mz86@njit.edu)

6

7 Antje Ihlefeld, Department of Biomedical Engineering, New Jersey  
8 Institute of Technology, Newark, NJ 07102, USA. Email: [antje.ihlefeld@njit.edu](mailto:antje.ihlefeld@njit.edu)

9

10 Short title: fNIRS objective measure of auditory attention

11

12 Corresponding author: Antje Ihlefeld, Department of Biomedical  
13 Engineering, New Jersey Institute of Technology, Newark, NJ 07102, USA. Email:  
14 [antje.ihlefeld@njit.edu](mailto:antje.ihlefeld@njit.edu). Phone: 973 596 5381. Fax: 973-596-5222.

15

16

17 **ABSTRACT**

18 Informational masking (IM) can greatly reduce speech intelligibility, but the neural  
19 mechanisms underlying IM are not understood. Binaural differences between  
20 target and masker can improve speech perception. In general, improvement in  
21 masked speech intelligibility due to provision of spatial cues is called spatial  
22 release from masking. Here, we focused on an aspect of spatial release from  
23 masking, specifically, the role of spatial attention. We hypothesized that in a  
24 situation with IM background sound 1) attention to speech recruits lateral frontal  
25 cortex (LFCx), and 2) LFCx activity varies with direction of spatial attention. Using  
26 functional near infrared spectroscopy (fNIRS), we assessed LFCx activity  
27 bilaterally in normal-hearing listeners. In experiment 1, two talkers were  
28 simultaneously presented. Listeners either attended to the target talker (speech  
29 task) or they listened passively to an unintelligible, scrambled version of the  
30 acoustic mixture (control task). Target and masker differed in pitch and interaural  
31 time difference (ITD). Relative to the passive control, LFCx activity increased  
32 during attentive listening. Experiment 2 measured how LFCx activity varied with  
33 ITD, by testing listeners on the speech task in experiment 1, except that talkers  
34 either were spatially separated by ITD or co-located. Results show that directing of  
35 auditory attention activates LFCx bilaterally. Moreover, right LFCx is recruited

36 more strongly in the spatially separated as compared with co-located  
37 configurations. Findings hint that LFCx function contributes to spatial release from  
38 masking in situations with IM.

39 Keywords: auditory attention, informational masking, functional infrared  
40 spectroscopy, lateral frontal cortex, spatial release from masking

41

42

43           **INTRODUCTION**

44           In everyday life, background speech often interferes with recognition of  
45 target speech. At least two forms of masking contribute to this reduced  
46 intelligibility, referred to as *energetic* and *informational* masking (EM and IM,  
47 Brungart, 2001; Freyman et al. 2001; Mattys et al. 2009; Jones and Litovsky,  
48 2011). EM occurs when sound sources have energy at the same time and  
49 frequency (e.g., Brungart et al. 2006). IM broadly characterizes situations when  
50 target and background sources are perceptually similar to each other or when the  
51 listener is uncertain about what target features to listen for in an acoustic mixture  
52 (for a recent review, see Kidd and Colburn, 2017). IM is thought to be a major  
53 factor limiting performance of hearing aid and cochlear implant devices (Shinn-  
54 Cunningham and Best, 2008; Marrone et al., 2008; Xia et al., 2017). However, the  
55 neural mechanisms underlying IM are not understood. The current study explores  
56 cortical processing of speech detection and identification in IM.

57           In EM-dominated tasks, computational models based on the output of the  
58 auditory nerve can closely capture speech identification performance (review:  
59 Goldsworthy and Greenberg, 2004). Consistent with this interpretation, subcortical  
60 responses encode the fidelity by which a listener processes speech in EM noise

61 (Anderson and Kraus, 2010). However, peripheral models fail to account for  
62 speech intelligibility in IM-dominated tasks (e.g., Cooke et al., 2008), suggesting  
63 that performance in IM is limited at least partially by mechanisms of the central  
64 nervous system.

65 In IM-dominated tasks, previous behavioral studies are consistent with the  
66 idea that in order to understand a masked target voice, listeners need to segregate  
67 short-term speech segments from the acoustic mixture, stream these brief  
68 segments across time to form a perceptual object and selectively attend to those  
69 perceptual features of the target object that distinguish the target talker from  
70 competing sound (Jones et al., 1999; Cusack et al., 2004; Ihlefeld and Shinn-  
71 Cunningham, 2008a). Previous work suggests that common onsets and  
72 harmonicity determine how short-term segments form (Darwin and Hukin, 1998;  
73 Micheyl et al., 2010). Differences in higher order perceptual features, including  
74 spatial direction and pitch, then allow listeners to link these short-term segments  
75 across time to form auditory objects (Darwin and Hukin, 2000; Brungart and  
76 Simpson, 2002; Darwin et al., 2003), enabling the listener to selectively attend to a  
77 target speaker and ignore the masker (Carlyon 2004; Shinn-Cunningham, 2008;  
78 Ihlefeld and Shinn-Cunningham, 2008b).

79           Rejection of competing auditory streams correlates with behavioral  
80 measures of short-term working memory (Conway et al., 2001). This raises the  
81 possibility that central regions linked to auditory short-term memory tasks are  
82 recruited in situations with IM. To test this prediction, here, we conducted two  
83 experiments to characterize blood oxygenation level dependent (BOLD) correlates  
84 of cortical responses while normal hearing (NH) subjects listened, either actively or  
85 passively, to speech in IM background sound. Recent work in NH listeners  
86 demonstrates that auditory short-term memory tasks can alter BOLD signals  
87 bilaterally in two areas of lateral frontal cortex (LFCx): 1) the transverse gyrus  
88 intersecting precentral sulcus (tgPCS) and 2) the caudal inferior frontal sulcus  
89 (cIFS; Michalka et al., 2015; Noyce et al., 2017). Here, we extend this work using  
90 functional near infrared spectroscopy (fNIRS) to record BOLD signals at these four  
91 regions of interest (ROIs).

92           In two experiments, we tested rapid-serial auditory presentation stimuli  
93 adapted from previous work by Michalka and colleagues (2015). Our goal was to  
94 examine how direction of auditory attention alters the BOLD responses in LFCx in  
95 a situation with IM, as assessed with fNIRS. In experiment 1, NH listeners were  
96 asked to detect keywords in a target message on the left side while a background

97 talker producing IM was simultaneously presented on the right. In a control  
98 condition, participants listened passively to an unintelligible, acoustically  
99 scrambled version of the same stimuli. We hypothesized that unlike in passive  
100 listening, when listeners actively tried to hear out speech in IM background sound  
101 this would recruit LFCx.

102 We further hypothesized that interactions between spatially directed  
103 auditory attention and LFCx activity would arise. An extensive literature documents  
104 that speech intelligibility improves and IM is released, when competing talkers are  
105 spatially separated as opposed to being co-located, a phenomenon referred to as  
106 spatial release from masking (e.g., Carhart et al, 1967; Darwin and Hukin, 1997;  
107 Kidd et al., 2010; Glyde et al., 2013). Using similar speech stimuli as in experiment  
108 1, we looked whether the mechanisms underlying spatial release from IM recruit  
109 LFCx, by comparing LFCx BOLD responses in the spatially separated  
110 configuration from experiment 1 versus a co-located configuration of the same  
111 stimuli. We reasoned that a stronger BOLD response in the spatially separated  
112 versus co-located configurations would support the view that spatial attention  
113 under IM activates LFCx. In contrast, a stronger LFCx response in the co-located

114 configuration would suggest that LFCx does not encode the direction of spatial  
115 auditory attention.

## 116 **PARTICIPANTS**

117 A total of 29 listeners (ages 19 to 25, 9 females) participated in the study  
118 and were paid for their time, with 14 participants in experiment 1 and 15  
119 participants in experiment 2. All listeners were native speakers of English, right-  
120 handed, and had normal audiometric pure-tone detection thresholds as assessed  
121 through standard audiometric testing at all octave frequencies from 250 Hz to 8  
122 kHz. At each tested frequency, tone detection thresholds did not differ by more  
123 than 10 dB across ears, and all thresholds were 20 dB HL or better. All listeners  
124 gave written informed consent to participate in the study. All testing was  
125 administered according to the guidelines of the Institutional Review Board of the  
126 New Jersey Institute of Technology.

## 127 **METHODS**

### 128 **Recording Setup**

129 Each listener completed one session of behavioral testing while we  
130 simultaneously recorded bilateral hemodynamic responses over the listener's left  
131 and right dorsal and ventral LFCx. The listener was seated approximately 0.8 m  
132 away from a computer screen with test instructions (Lenovo ThinkPad T440P),



133 inside a testing suite with a moderately quiet background sound level of less than  
134 44 dBA. The listener held a wireless response interface in the lap (Microsoft Xbox  
135 360 Wireless Controller) and wore insert earphones (Etymotic Research ER-2) for  
136 delivery of sound stimuli. The setup is shown in Figure 1A.

137         A camera-based 3D-location tracking and pointer tool system (Brainsight  
138 2.0 software and hardware by Rogue Research Inc., Canada) allowed the  
139 experimenter to record four coordinates on the listener's head: nasion, inion, and  
140 bilateral preauricular points. Following the standard Montreal Neurological Institute  
141 (MNI) ICBM-152 brain atlas (Talairach and Tournoux, 1988), these four landmark  
142 coordinates were then used as reference for locating the four regions of interest  
143 (ROIs, locations illustrated in Fig. 1B). Infrared optodes were placed on the  
144 listener's head directly above the four ROIs, specifically, the left tgPCS, left cIFS,  
145 right tgPCS, and right cIFS. A custom-built head cap, fitted to the listener's head  
146 via adjustable straps, embedded the optodes and held them in place.

147         Acoustic stimuli were generated in Matlab (Release R2016a, The  
148 Mathworks, Inc., Natick, MA, USA), D/A converted with a sound card (Emotiva  
149 Stealth DC-1; 16 bit resolution, 44.1 kHz sampling frequency) and presented over

150 the insert earphones. This acoustic setup was calibrated with a 2-cc coupler, 1/2"  
151 pressure-field microphone and a sound level meter (Bruel&Kjaer 2250-G4).

152 Using a total of 4 source optodes and 16 detector optodes, a continuous-  
153 wave diffuse-optical NIRS system (CW6; TechEn Inc., Milford, MA) simultaneously  
154 recorded light absorption at two different wavelengths, 690 and 830 nm, with a  
155 sampling frequency of 50 Hz. Sound delivery and optical recordings were  
156 synchronized via trigger pulse with a precision of 20 ms. Using a time-multiplexing  
157 algorithm developed by Huppert and colleagues (2009), multiple source optodes  
158 were paired with multiple detector optodes. A subset of all potential combinations  
159 of optode-detector pairs was interpreted as response channels and further  
160 analyzed. Specifically, on both sides of the head, we combined one optical source  
161 and four detectors into one probe set according to the channel geometry shown in  
162 Figure 1C. On each side of the head, we had 2 probe sets placed directly above  
163 cIFS and tgPCS on the scalp. Within each source-detector channel, the distance  
164 between source and detector determined the depth of the light path relative to the  
165 surface of the skull (review: Ferrari and Quaresima, 2012). To enable us to partial  
166 out the combined effects of nuisance signals such as cardiac rhythm, respiratory  
167 induced change, and blood pressure variations from the desired hemodynamic

168 response driven neural events in cortex, we used two recording depths. Deep  
169 channels, used to estimate the neurovascular response of cortical tissue between  
170 0.5 to 1 cm below the surface of the skull, had a 3 cm source-detector distance  
171 (solid lines in Fig. 1C), whereas shallow channels, used to estimate physiological  
172 noise, had a source-detector distance of 1.5 cm (dotted line in Fig. 1C). At each of  
173 the four ROIs, we recorded with four concentrically arranged deep channels and  
174 one shallow channel and averaged the traces of the four deep channels, to  
175 improve the noise floor. As a result, for each ROI, we obtained one deep trace,  
176 which we interpreted as neurovascular activity, and one shallow trace, which we  
177 interpreted as nuisance activity.

### 178 **Controlled Breathing Task**

179 Variability in skull thickness, skin pigmentation and other idiosyncratic factors  
180 can adversely affect recording quality with fNIRS (Yoshitani et al., 2007; Bickler et  
181 al., 2013). As a control for reducing group variance and to monitor recording quality,  
182 listeners initially performed a non-auditory task, illustrated in Figure 1D. This non-  
183 auditory task consisted of 11 blocks of controlled breathing (Thomason et al., 2007).  
184 During each of these blocks, visuals on the screen instructed listeners to 1) “Inhale”  
185 via a gradually expanding green circle, or 2) “Exhale” via a shrinking green circle, or  
186 3) “Hold breath” via a countdown on the screen. Using this controlled breathing

187 method, listeners were instructed to follow a sequence of inhaling for 5 s, followed  
188 by exhaling for 5 s, for a total of 30 s. At the end of this sequence, listeners were  
189 instructed to inhale for 5 s and then hold their breath for 15 s. Our criterion for robust  
190 recording quality was that for each listener, breath holding needed to induce a  
191 significant change in the hemodynamic response at all ROIs (analysis technique  
192 and statistical tests described below), otherwise that listener's data would have been  
193 excluded from further analysis. Moreover, we used the overall activation strength of  
194 the hemodynamic response during breath holding for normalizing the performance  
195 in the auditory tasks (details described below).

## 196 **Auditory Tasks**

197       Following the controlled breathing task, listeners performed experiment 1,  
198 consisting of 24 blocks of behavioral testing with their eyes closed. Each listener  
199 completed 12 consecutive blocks of an active and 12 consecutive blocks of a  
200 passive listening task, with task order (active versus passive) counter-balanced  
201 across listeners. In each block, two competing auditory streams of 15 s duration  
202 each were presented simultaneously. In the active listening task, we presented  
203 intelligible speech utterances, whereas in the passive listening task, we presented

204 unintelligible scrambled speech. Figure 2 shows a schematic of the paradigm (A)  
205 and spectrograms for two representative stimuli (B).

206 In experiment 1, the target stream was always presented with a left-leading  
207 interaural time difference (ITD) of 500  $\mu$ s, while the concurrent masker stream was  
208 presented with a right-leading ITD of 500  $\mu$ s (spatially separated configuration). In  
209 experiment 2, we also tested a spatially co-located configuration, where both the  
210 target and the masker had 0  $\mu$ s ITD. In experiment 1, the broadband root means  
211 square values of the stimuli were equated at 59 dBA, then randomly roved from 53  
212 to 65 dBA, resulting in broadband signal-to-noise ratios from -6 to 6 dB, so that  
213 listeners could not rely on level cues to detect the target. In order to remove level  
214 cues entirely, giving spatial cues even more potential strength for helping the  
215 listener attend to the target, in experiment 2, we made the target and masker  
216 equally loud. In experiment 2, both target and masker were presented at 59 dBA.  
217 Unfortunately, due to a programming error, listeners' responses were inaccurately  
218 recorded during the auditory tasks of experiments 1 and 2 and are thus not  
219 reported here. During pilot testing with the tested stimulus parameters (not shown  
220 here), speech detection performance was 90% correct or better across all  
221 conditions.

222           In the active task, stimuli consisted of two concurrent rapid serial streams of  
223 spoken words. Speech utterances were chosen from a closed-set corpus (Kidd et  
224 al. 2008). There were sixteen possible words, consisting of the colors <red, white,  
225 blue, and green> and the objects <hats, bags, card, chairs, desks, gloves, pens,  
226 shoes, socks, spoons, tables, and toys>. Those words were recorded from two  
227 male talkers, spoken in isolation. The target talker had an average pitch of 115 Hz  
228 versus 144 Hz for the masker talker. Using synchronized overlap-add with fixed-  
229 synthesis (Hejna and Musicus, 1991), all original utterances were time-scaled to  
230 make each word last 300 ms. Words from both the target and masker talkers were  
231 simultaneously presented, in random order with replacement. Specifically, target  
232 and masker streams each consisted of 25 words with 300 ms of silence between  
233 consecutive words (total duration 15 s).

234           To familiarize the listener with the target voice, at the beginning of each  
235 active block, we presented the target voice speaking the sentence “Bob found five  
236 small cards” at 59 dBA and instructed the listeners to remember this voice.  
237 Listeners were further instructed to press the right trigger button on the handheld  
238 response interface each time the target talker to their left side uttered any of the  
239 four *color* words, while ignoring all other words from both the target and the

240 masker. A random number (between three and five) of color words in the target  
241 voice would appear during each block. No response feedback was provided to the  
242 listener.

243           In the passive task, we simultaneously presented two streams of  
244 concatenated scrambled speech tokens that were processed to be unintelligible.  
245 Stimuli in the passive task were derived from the stimuli in the active task.  
246 Specifically, using an algorithm by Ellis (2010) unprocessed speech tokens were  
247 time-windowed into snippets of 25 ms duration, with 50 % temporal overlap  
248 between consecutive time-steps. Using a bank of 64 GammaTone filters with  
249 center frequencies that were spaced linearly along the human Equivalent  
250 Rectangular Bandwidth scale (ERB, Patterson and Holdsworth, 1996) and that  
251 had bandwidths of 1.5 ERB, the time-windowed snippets were bandpass filtered.  
252 Within each of the 64 frequency bands, the bandpass-filtered time-windowed  
253 snippets were permuted with a Gaussian probability distribution over a radius of  
254 250 ms, and added back together, constructing scrambled tokens of speech.  
255 Thus, the scrambled speech tokens had similar magnitude spectra and similar  
256 temporal-fine structure characteristics as the original speech utterances, giving

257 them speech-like perceptual qualities. However, because the sequence of the  
258 acoustic snippets was shuffled, the scrambled speech was unintelligible.

259         Furthermore, the passive differed from the active task in that the handheld  
260 response vibrated randomly between 3 and 5 times during each block. Listeners  
261 were instructed to passively listen to the sounds and press the right trigger button  
262 on the handheld response interface each time the interface vibrated, ensuring that  
263 the listener stayed engaged in this task. Listeners need to correctly detect at least  
264 2 out of 3 vibrations, otherwise they were excluded from the study.

265         In the active task of experiment 1, target and masker differed in both voice  
266 pitch and perceived spatial direction, and listeners could use either cue to direct  
267 their attention to the target voice. Experiment 2 further assessed the role of spatial  
268 attention in two active tasks. The first task (“spatial cues”) was identical to the  
269 active condition of Experiment 1. The second task (“no spatial cues”) used similar  
270 stimuli as the active task in experiment 1, except that both sources had 0  $\mu$ s ITD.  
271 Thus, in experiment 2, each listener completed six blocks of an active listening  
272 task that was identical to the active task in experiment 1 and six blocks of another  
273 active listening task that was similar to the active task in experiment 1, except that  
274 the spatial cues were removed. Blocks were randomly interleaved. Listeners



275 indicated when they detected the target talker uttering one of the four color words,  
276 by pressing the right trigger on the handheld response interface.

### 277 **Signal Processing of the fNIRS traces**

278 We used HOMER2 (Huppert et al. 2009), a set of Matlab-based scripts, to  
279 analyze the raw recordings of the deep and shallow fNIRS channels at each of the  
280 4 ROIs. First, the raw recordings were band-pass filtered between 0.01 and 0.3  
281 Hz, using a fifth order zero-phase Butterworth filter. Next, we removed slow  
282 temporal drifts in the band-pass filtered traces by de-trending each trace with a  
283 20th-degree polynomial (Pei et al., 2007). To remove artefacts due to sudden  
284 head movement during the recording, the detrended traces were then wavelet  
285 transformed using Daubechies 2 (db2) base functions. We removed wavelet  
286 coefficients that were outside of one interquartile range (IQR) (Molavi et al. 2012).  
287 We applied the modified Beer-Lambert law (Cope and Delpy, 1988; Kocsis et al.,  
288 2006) to these processed traces and obtained the estimated oxygenated  
289 hemoglobin (HbO) concentrations for the deep and shallow channels at each ROI.  
290 To partial out physiological nuisance signals, thus reducing across-listener  
291 variability, we then normalized all HbO traces from the task conditions by dividing  
292 them by the maximal HbO concentration change during controlled breathing.

### 293 **Calculation of Activation levels**

294 For each of the auditory task conditions and ROIs, we wished to determine what  
295 portion of each hemodynamic response could be attributed to the behavioral task.  
296 Therefore, HbO traces were fitted by four general linear models (GLM), one GLM  
297 for each ROI. Each GLM was of the form:

$$298 \quad y(t) = x_{\text{task } 1}(t)\beta_1 + x_{\text{task } 2}(t)\beta_2 + x_{\text{nuisance}}(t)\beta_3 + \varepsilon(t),$$

299 where  $y$  is the HbO trace,  $t$  is time, and the  $\beta_i$ -values indicate the activation  
300 levels of each of the regressors. We calculated the  $\beta_i$ -values for each listener and  
301 ROI. Specifically,  $x_{\text{task } i}(t)$  was the regressor of the hemodynamic change attributed  
302 to behavioral task  $i$ .  $x_{\text{nuisance}}(t)$  the HbO concentration in the shallow channel  
303 (Brigadoi and Cooper, 2015), and  $\varepsilon(t)$  the residual error of the GLM.

304 The task regressors  $x_{\text{task } i}$  in the GLM design matrix then contained  
305 reference functions for the corresponding task, each convolved with a canonical  
306 hemodynamic response function (HRF, Lindquist et al., 2009):

$$307 \quad HRF(t) = \frac{1}{\Gamma(6)} t^5 e^{-t} - \frac{1}{6\Gamma(16)} t^{15} e^{-t}, \text{ where } \Gamma \text{ was the gamma function.}$$

308 Task reference functions were built from unit step functions as follows. In the  
309 controlled breathing task, the reference function equaled 1 during the breath  
310 holding time intervals, and 0 otherwise. Only one task regressor was used to  
311 model the controlled breathing task. In the auditory tasks, two reference functions

312 were built, one for each task, and set to 1 for stimulus present, and 0 for stimulus  
313 absent.

### 314 **Statistical Analysis**

315 To assess whether the HbO activation levels at each ROI differed from 0,  
316 we applied two-sided Student's t-tests. Furthermore, to determine whether HbO  
317 activation levels differed from each other across the two task conditions of each  
318 experiment, left/right hemispheres and dorsal (tgPCS)/ventral (cIFS) sites, 2x2x2  
319 repeated-measures analyses of variance (rANOVA) were applied to the  $\beta_i$ -values,  
320 at the 0.05 alpha level for significance. To correct for multiple comparisons, all  
321 reported p values were Bonferroni-corrected.

## 322 **RESULTS**

### 323 **Controlled Breathing Task**

324 Figure 3 shows the HbO traces during the controlled breathing task for both  
325 experiments 1 and 2, at each of the four ROIs. Two-sided Student's t-test on the  $\beta$ -  
326 values of the GLM revealed that at each ROI, the mean activation levels during  
327 breath holding differed significantly from 0 [ $t(13) = -7$ ,  $p < 0.001$  at left tgPCS;  
328  $t(13) = -7$ ,  $p < 0.001$  at right tgPCS;  $t(13) = -6.5$ ,  $p < 0.001$  at left cIFS;  $t(13) = -7.5$ ,  
329  $p < 0.001$  at right cIFS, after Bonferroni corrections]. Two-sided Student's t-test  
330 confirmed that also in experiment 2, HbO activation levels during breath holding

331 significantly differed from 0 [ $t(13) = -5.6$ ,  $p < 0.001$  at left tgPCS;  $t(13) = -3.4$ ,  
332  $p < 0.001$  at right tgPCS;  $t(13) = -4$ ,  $p < 0.001$  at left clFS;  $t(13) = -3.7$ ,  $p = 0.006$  at  
333 right clFS]. Thus, breath holding induced a significant change in the BOLD  
334 response at all four ROIs, confirming feasibility of the recording setup and  
335 providing a baseline reference for normalizing the task-evoked HbO traces of  
336 experiments 1 and 2.

### 337 **Experiment 1**

338 Figure 4A shows the HbO traces during active versus passive listening, at  
339 each of the four ROIs. Solid lines denote the auditory attention condition, dotted  
340 lines passive listening. The ribbons around each trace show one standard error of  
341 the mean across listeners. Figure 4B shows BOLD activation levels  $\beta$ , averaged  
342 across listeners, during the auditory attention (solid fill) and the passive listening  
343 tasks (hatched fill). Error bars show one standard error of the mean. All listeners  
344 reached criterion performance during behavioral testing and were included in the  
345 group analysis. RANOVA revealed significant main effects of task [ $F(1,13) = 6.5$ ,  
346  $p = 0.024$ ] and dorsal (tgPCS)/ventral (clFS) site [ $F(1,13) = 6.1$ ,  $p = 0.028$ ]. The  
347 effect of hemisphere was not significant [ $F(1,13) = 0.015$ ,  $p = 0.9$ ]. In experiment 1,  
348 listeners were tested over 12 blocks, a number we initially chose conservatively.  
349 To investigate the minimum number of blocks needed to see a robust difference

350 between active and passive listening conditions, we applied a power analysis.  
351 Using bootstrapping of sampling without replacements, we calculated activation  
352 levels  $\beta$  during active versus passive listening in 100 repetitions and found that a  
353 minimum of 6 blocks suffices to show a robust effect. Therefore, in experiment 2,  
354 listeners were tested using 6 blocks per condition.

## 355 **Experiment 2**

356 Figures 5A and B display the HbO traces (red lines denote spatially  
357 separated, blue lines co-located configurations) and the across-listener average in  
358 BOLD activation  $\beta$ -levels for the spatially separated (red fill) versus co-located  
359 configurations (blue fill), at each of the four ROIs. 14 listeners reached criterion  
360 performance during behavioral testing and were included in the group analysis.  
361 One listener's data had to be excluded, because the participant had fallen asleep  
362 during testing. An rANOVA on the activation levels found a significant main effect  
363 of dorsal/ventral site [ $F(1,13) = 10.3, p = 0.007$ ]. Main effects of spatial  
364 configuration and left/right hemisphere were not significant [ $F(1,13) = 1.6, p =$   
365  $0.212$  for effect of task;  $F(1,13) = 0.153, p = 0.702$  for effect of hemisphere]. In  
366 addition, the interaction between task and left/right hemisphere was significant  
367 [ $F(1,13) = 7.2, p = 0.019$ ], confirming an overall stronger activation in the right  
368 hemisphere in the spatially separated as compared to the co-located configuration.

369 **DISCUSSION**

370 **1. Physiological correlates of active listening exist in LFCx**

371 In experiment 1, we presented two competing streams of rapidly changing  
372 words. All target and masker words were drawn from an identical corpus of  
373 possible words, uttered by two male talkers and played synchronously. As a result,  
374 both EM and IM interfered with performance. When the sounds were unintelligible  
375 scrambled speech and the participants listened passively, across all ROIs, the  
376 LFCx responses were smaller as compared to the active auditory attention task.  
377 Thus, direction of auditory attention increased bilateral BOLD responses in LFCx.  
378 These results support and extend previous finding on the role of LFCx. Using rapid  
379 serial presentation task with two simultaneous talkers, where listeners monitored a  
380 target stream in search for targets and were tasked to detect-and-identify target  
381 digits, prior work had revealed an auditory bias of LFCx regions (Michalka et al.,  
382 2015). Here we found that even when listeners were performing a detection-only  
383 task under conditions of IM, this resulted in robust recruitment of LFCx. Moreover,  
384 the current results show that attentive listening in a situation with IM recruits LFCx,  
385 whereas passive listening does not.

386 **2. Right LFCx activation associated with SRM**

387           We wished to disentangle the role of spatial attention on the LFCx BOLD  
388 response. In experiment 1, spatial differences between target and masker were  
389 available. However, the target voice also had a slightly lower pitch than the masker  
390 voice, and listeners could utilize either or both cues to attend to the target (Ihfeldt  
391 and Shinn-Cunningham, 2008b). Therefore, we presented two different spatial  
392 configurations in experiment 2 – a spatially separated configuration, where spatial  
393 attention could help performance, and a spatially co-located configuration, where  
394 spatial attention cues were not available. Contrasting active listening across these  
395 two spatial configurations, experiment 2 revealed that right LFCx was more  
396 strongly recruited in the spatially separated as compared to the co-located  
397 configuration. In contrast, in left LFCx, no difference in BOLD signals was  
398 observed across the two spatial configurations. Therefore, these findings are  
399 consistent with the interpretation that right LFCx BOLD activation contained  
400 significant information about the direction of spatial attention.

401           In general, spatial release from masking is thought to arise from three  
402 different mechanisms (e.g., Shinn-Cunningham et al., 2005), monaural head  
403 shadow, assumed to be a purely acoustic phenomenon, binaural decorrelation  
404 processing, and spatial attention. The current stimuli did not provide head shadow.

405 Therefore, in the current paradigm, spatial cues could have contributed to spatial  
406 release from masking through two mechanisms, binaural decorrelation,  
407 presumably arising at or downstream from the brainstem (Wong and Stapells,  
408 2004; Dajani and Picton, 2006; Wack et al., 2012) and spatial attention, assumed  
409 to arise at cortical processing levels (Zatorre et al., 1999; Ahveninen et al., 2006;  
410 Shomstein and Yantis, 2006; Wu et al., 2007; Larson and Lee, 2014).

411 Alternatively, or in addition, a stronger BOLD response in the spatially  
412 separated versus co-located configurations could also be interpreted in support of  
413 the notion that right LFCx BOLD activity correlates with overall higher speech  
414 intelligibility in the spatially separated configuration. However, converging  
415 evidence from recent studies in NH listeners finds physiological correlates of  
416 speech intelligibility in the *left* hemisphere and at the level of auditory cortex as  
417 opposed to LFCx (Scott et al., 2009; Olds et al., 2016; Pollonini et al., 2014;  
418 Sheffield et al., *in press*). It is possible that here, listeners had to spend more  
419 listening effort in the spatially co-located versus separated configurations.  
420 However, comparing noise-vocoded versus unprocessed speech in quiet, or in  
421 competing background speech, previous work finds that increased effort  
422 differentially activates the *left* inferior frontal gyrus (Wiggins et al., 2016a;



423 Wijayasiri et al., 2017). Moreover, testing NH listeners with a 2-back working  
424 memory task on auditory stimuli, Noyce and colleagues (2017) confirmed the  
425 existence of auditory-biased LFCx regions, suggesting that here, the observed  
426 physiological correlates of spatial release from masking may be caused by  
427 differences in utilization of short-term memory across the two spatial  
428 configurations. Together, the current findings support a hypothesis already  
429 proposed by others (Papesh et al., 2017) that a cortical representation of spatial  
430 release from masking exists, and suggest that assessment of right LFCx activity is  
431 a viable objective physiological measure of spatial release from masking.

432         Recent work shows that decoding of cortical responses is a feasible  
433 measure for determining which talker a listener attends to (e.g., Mesgarani and  
434 Chang, 2012; Choi et al., 2013; O'sullivan et al., 2104; Mirkovic et al., 2015).  
435 Moreover, previous physiological work on speech perception in situations with  
436 EM or IM shows recruitment of frontal-parietal regions when listening to speech  
437 with EM (Scott et al., 2004) and suggests that the left superior temporal gyrus is  
438 differentially recruited for IM whereas recruitment of the right superior temporal  
439 gyrus is comparable for both types of masker (Scott et al., 2009). With the current

440 paradigm, LFCx recruitment could be used to predict whether or not a listener  
441 attends to spatial attributes of sound, a question to be investigated by future work.

### 442 **3. Utility of fNIRS as objective measure of auditory attention**

443 A growing literature shows that fNIRS recordings are a promising tool for  
444 assessing the neurobiological basis of clinical outcomes in cochlear implant users  
445 (e.g., Dewey and Hartley, 2015; Lawler et al., 2015; McKay et al., 2106; van de  
446 Rijt, et al., 2016). Cochlear implants are ferromagnetic devices, and when imaged  
447 with Magnetic Resonance Imaging (MRI), electroencephalography (EEG), or  
448 magnetoencephalography (MEG), the implants typically cause large  
449 electromagnetic artifacts and are sometimes even unsafe for use inside the  
450 imaging device. In contrast to MRI, EEG and MEG, fNIRS uses light to measure  
451 BOLD signals and thus does not produce electromagnetic artifacts when used in  
452 conjunction with cochlear implants. Moreover, compared to fMRI machines, fNIRS  
453 scanners are quiet, they do not require the listener to remain motionless and are  
454 thus more child-friendly (c.f., Bortfeld et al., 2009), and they are generally more  
455 cost effective.

456 However, previous work using fNIRS for assessing auditory functions found  
457 highly variable responses to auditory speech at the group level (Wiggins et al.,

458 2016b). To reduce across-listener variability, here, we used the individual's own  
459 maximal amplitude during controlled breathing for normalizing the HbO traces  
460 during the auditory task, followed by fitting a GLM where we regressed out  
461 nuisance signals from a shallow trace that recorded blood oxygenation close to the  
462 surface of the skull. Results demonstrate that fNIRS is a feasible approach for  
463 characterizing central auditory function in NH listeners.

464 Objective measures of masked speech identification in IM could, for  
465 instance, be used to assess the neurobiological basis for predicting rehabilitative  
466 success in newly implanted individuals. A long-term goal of our work is thus to  
467 establish an objective measure of auditory attention that could be used to study  
468 central nervous function in cochlear implant users. Here we find that fNIRS is a  
469 promising tool for recording objective measures of spatial auditory attention in NH  
470 listeners, with potential application in cochlear implant users.

#### 471 **4. Conclusions**

472 Two experiments demonstrated that when NH listeners are tasked with  
473 detecting the presence of target keywords in a situation with IM, bilateral LFCx  
474 BOLD responses, as assessed through fNIRS, carry information about whether or  
475 not a listener is attending to sound. In addition, right LFCx responses were

476 stronger in a spatially separated as compared to a co-located configuration,  
477 suggesting that right LFCx activity is associated with spatially directed attention.

478 **ACKNOWLEDGMENTS**

479 This work was supported by the New Jersey Health Foundation (PC 24-18  
480 to AI) and the National Science Foundation (MRI CBET 1428425 to T Alvarez and  
481 B Biswal).

482

483 **REFERENCES**

- 484 Ahveninen, J., Jääskeläinen, I.P., Raij, T., Bonmassar, G., Devore, S., Hämäläinen, M.,  
485 Levänen, S., Lin, F.H., Sams, M., Shinn-Cunningham, B.G. & Witzel, T., 2006. Task-  
486 modulated “what” and “where” pathways in human auditory cortex. *Proceedings of the*  
487 *National Academy of Sciences*, 103(39), pp.14608-14613.
- 488 Anderson, S. and Kraus, N., 2010. Objective neural indices of speech-in-noise perception.  
489 *Trends in amplification*, 14(2), pp.73-83.
- 490 Bickler P. E., Feiner J. R., Rollins M. D., 2013. Factors affecting the performance of 5  
491 cerebral oximeters during hypoxia in healthy volunteers. *Anesth. Analg.* 117, 813–823  
492 10.1213/ANE.0b013e318297d763
- 493 Bortfeld, H., Wruck, E. and Boas, D.A., 2007. Assessing infants' cortical response to speech  
494 using near-infrared spectroscopy. *Neuroimage*, 34(1), pp.407-415.
- 541 Brigadoi, S., & Cooper, R. J., 2015. How short is short? Optimum source–detector distance  
542 for short-separation channels in functional near-infrared spectroscopy. *Neurophotonics*,  
543 2(2), 025005. doi:10.1117/1.nph.2.2.025005
- 544 Brungart, D. S., 2001. Informational and energetic masking effects in the perception of two  
545 simultaneous talkers. *The Journal of the Acoustical Society of America*, 109(3), 1101-1109.  
546 doi:10.1121/1.1345696
- 547 Brungart, D.S. and Simpson, B.D., 2002. The effects of spatial separation in distance on  
548 the informational and energetic masking of a nearby speech signal. *The Journal of the*  
549 *Acoustical Society of America*, 112(2), pp.664-676.
- 550 Brungart D., Chang P., Simpson B., and Wang D., 2006. Isolating the energetic component  
551 of speech-on-speech masking with ideal time-frequency segregation. *J. Acoust. Soc. Am.*  
552 10.1121/1.2363929 120, 4007–4018
- 553 Carhart, R., Tillman, T.W. and Johnson, K.R., 1967. Release of masking for speech through  
554 interaural time delay. *The Journal of the Acoustical Society of America*, 42(1), pp.124-138.
- 555 Carlyon, R.P., 2004. How the brain separates sounds. *Trends in cognitive sciences*, 8(10),  
556 pp.465-471.

- 557 Choi, I., Rajaram, S., Varghese, L.A. and Shinn-Cunningham, B.G., 2013. Quantifying  
558 attentional modulation of auditory-evoked cortical responses from single-trial  
559 electroencephalography. *Frontiers in human neuroscience*, 7, p.115.
- 560 Conway, A.R., Cowan, N. and Bunting, M.F., 2001. The cocktail party phenomenon  
561 revisited: The importance of working memory capacity. *Psychonomic bulletin & review*, 8(2),  
562 pp.331-335.
- 563 Cooke, M., Garcia Lecumberri, M.L. and Barker, J., 2008. The foreign language cocktail  
564 party problem: Energetic and informational masking effects in non-native speech  
565 perception. *The Journal of the Acoustical Society of America*, 123(1), pp.414-427.
- 566 Cope, M & Delpy, D. T., 1988. System for long term measurement of cerebral blood and  
567 tissue oxygenation on newborn infants by near infrared transillumination. *Med. Biol. Eng.*  
568 *Comput.* 26(3) 289-94
- 569 Cusack, R., Decks, J., Aikman, G. and Carlyon, R.P., 2004. Effects of location, frequency  
570 region, and time course of selective attention on auditory scene analysis. *Journal of*  
571 *experimental psychology: human perception and performance*, 30(4), p.643.
- 572 Dajani, H. R., & Picton, T. W., 2006. Human auditory steady-state responses to changes  
573 in interaural correlation. *Hearing Research*, 219(1-2), 85-100.  
574 doi:10.1016/j.heares.2006.06.003
- 575 Darwin, C.J. and Hukin, R.W., 1997. Perceptual segregation of a harmonic from a vowel  
576 by interaural time difference and frequency proximity. *The Journal of the Acoustical*  
577 *Society of America*, 102(4), pp.2316-2324.
- 578 Darwin, C.J. and Hukin, R.W., 1998. Perceptual segregation of a harmonic from a vowel  
579 by interaural time difference in conjunction with mistuning and onset asynchrony. *The*  
580 *Journal of the Acoustical Society of America*, 103(2), pp.1080-1084.
- 581 Darwin, C.J. and Hukin, R.W., 2000. Effectiveness of spatial cues, prosody, and talker  
582 characteristics in selective attention. *The Journal of the Acoustical Society of America*,  
583 107(2), pp.970-977.

- 584 Darwin, C.J., Brungart, D.S. and Simpson, B.D., 2003. Effects of fundamental frequency  
585 and vocal-tract length changes on attention to one of two simultaneous talkers. The  
586 Journal of the Acoustical Society of America, 114(5), pp.2913-2922.
- 587 Dewey, R.S. and Hartley, D.E., 2015. Cortical cross-modal plasticity following deafness  
588 measured using functional near-infrared spectroscopy. Hearing research, 325, pp.55-63.
- 589 Ellis, D. P., 2010. Time-domain scrambling of audio signals in Matlab", web resource:  
590 <http://www.ee.columbia.edu/~dpwe/resources/matlab/scramble/>
- 591 Ferrari, M., & Quaresima, V., 2012. A brief review on the history of human functional near-  
592 infrared spectroscopy (fNIRS) development and fields of application. NeuroImage, 63(2),  
593 921-935. doi:10.1016/j.neuroimage.2012.03.049
- 594 Freyman R. L., Balakrishnan U., and Helfer K. S., 2001. Spatial release from informational  
595 masking in speech recognition. J. Acoust. Soc. Am. 10.1121/1.1354984 109, 2112–2122
- 596 Glyde, H., Buchholz, J.M., Dillon, H., Cameron, S. and Hickson, L., 2013. The importance  
597 of interaural time differences and level differences in spatial release from masking. The  
598 Journal of the Acoustical Society of America, 134(2), pp.EL147-EL152.
- 599 Goldsworthy, R. L., & Greenberg, J. E., 2004. Analysis of speech-based speech  
600 transmission index methods with implications for nonlinear operations. The Journal of the  
601 Acoustical Society of America, 116(6), 3679-3689. doi:10.1121/1.1804628
- 602 Hejna, D., & Musicus, B.R., 1991. The SOLAFS Time-Scale Modification Algorithm. BBN  
603 Technical Report, July 1991.
- 604 Huppert, T. J., Diamond, S. G., Franceschini, M. A., & Boas, D. A., 2009. HomER: A review  
605 of time-series analysis methods for near-infrared spectroscopy of the brain. Applied Optics,  
606 48(10). doi:10.1364/ao.48.00d280
- 607 Ihlefeld, A. and Shinn-Cunningham, B., 2008a. Spatial release from energetic and  
608 informational masking in a selective speech identification task. The Journal of the Acoustical  
609 Society of America, 123(6), pp.4369-4379.

- 610 Ihlefeld, A. and Shinn-Cunningham, B., 2008b. Disentangling the effects of spatial cues on  
611 selection and formation of auditory objects. *The Journal of the Acoustical Society of*  
612 *America*, 124(4), pp.2224-2235.
- 613 Jones, D., Alford, D., Bridges, A., Tremblay, S. and Macken, B., 1999. Organizational  
614 factors in selective attention: The interplay of acoustic distinctiveness and auditory  
615 streaming in the irrelevant sound effect. *Journal of Experimental Psychology: Learning,*  
616 *Memory, and Cognition*, 25(2), p.464.
- 617 Jones, G. L., & Litovsky, R. Y., 2011. A cocktail party model of spatial release from masking  
618 by both noise and speech interferers. *The Journal of the Acoustical Society of America*,  
619 130(3), 1463-1474. doi:10.1121/1.3613928 Kidd, G., Best, V., & Mason, C. R., 2008.  
620 Listening to every other word: Examining the strength of linkage variables in forming  
621 streams of speech. *The Journal of the Acoustical Society of America*, 124(6), 3793-3802.  
622 doi:10.1121/1.2998980
- 623 Kidd Jr, G., Mason, C.R., Best, V. and Marrone, N., 2010. Stimulus factors influencing  
624 spatial release from speech-on-speech masking. *The Journal of the Acoustical Society of*  
625 *America*, 128(4), pp.1965-1978.
- 626 Kidd G. Jr., & Colburn H. S., 2017. Informational masking in speech recognition. In  
627 Middlebrooks J. C., Simon J. Z., Popper A.N., & Fay R. R. (Eds.), *The auditory system at*  
628 *the cocktail party* (pp. 75–109). New York, NY: Springer Nature.
- 629 Kocsis, L., Herman, P., & Eke, A., 2006. The modified Beer–Lambert law revisited. *Physics*  
630 *in Medicine and Biology*, 51(5). doi:10.1088/0031-9155/51/5/n02
- 631 Larson, E., & Lee, A. K., 2014. Switching auditory attention using spatial and non-spatial  
632 features recruits different cortical networks. *NeuroImage*, 84, 681-687.  
633 doi:10.1016/j.neuroimage.2013.09.061 Lawler, C.A., Wiggins, I.M., Dewey, R.S. and  
634 Hartley, D.E., 2015. The use of functional near-infrared spectroscopy for measuring cortical  
635 reorganisation in cochlear implant users: A possible predictor of variable speech  
636 outcomes?. *Cochlear implants international*, 16(sup1), pp.S30-S32.



- 637 Lindquist, M. A., Loh, J. M., Atlas, L. Y., & Wager, T. D., 2009. Modeling the hemodynamic  
638 response function in fMRI: Efficiency, bias and mis-modeling. *NeuroImage*, 45(1).  
639 doi:10.1016/j.neuroimage.2008.10.065
- 640 Marrone, N., Mason, C.R. and Kidd Jr, G., 2008. Evaluating the benefit of hearing aids in  
641 solving the cocktail party problem. *Trends in amplification*, 12(4), pp.300-315.
- 642 Mattys, S. L., Brooks, J., & Cooke, M., 2009. Recognizing speech under a processing load:  
643 Dissociating energetic from informational factors. *Cognitive Psychology*, 59(3), 203-243.  
644 doi:10.1016/j.cogpsych.2009.04.001
- 645 McKay, C.M., Shah, A., Seghouane, A.K., Zhou, X., Cross, W. and Litovsky, R., 2016.  
646 Connectivity in language areas of the brain in cochlear implant users as revealed by fNIRS.  
647 In *Physiology, Psychoacoustics and Cognition in Normal and Impaired Hearing* (pp. 327-  
648 335). Springer, Cham.
- 649 Mesgarani, N. and Chang, E.F., 2012. Selective cortical representation of attended speaker  
650 in multi-talker speech perception. *Nature*, 485(7397), p.233.
- 651 Michalka, S., Kong, L., Rosen, M., Shinn-Cunningham, B., & Somers, D., 2015. Short-Term  
652 Memory for Space and Time Flexibly Recruit Complementary Sensory-Biased Frontal Lobe  
653 Attention Networks. *Neuron*, 87(4), 882-892. doi:10.1016/j.neuron.2015.07.028
- 654 Micheyl, C., Hunter, C. and Oxenham, A.J., 2010. Auditory stream segregation and the  
655 perception of across-frequency synchrony. *Journal of Experimental Psychology: Human*  
656 *Perception and Performance*, 36(4), p.1029.
- 657 Mirkovic, B., Debener, S., Jaeger, M. and De Vos, M., 2015. Decoding the attended speech  
658 stream with multi-channel EEG: implications for online, daily-life applications. *Journal of*  
659 *neural engineering*, 12(4), p.046007.
- 660 Molavi, B., & Dumont, G. A., 2010. Wavelet based motion artifact removal for Functional  
661 Near Infrared Spectroscopy. 2010 Annual International Conference of the IEEE Engineering  
662 in Medicine and Biology. doi:10.1109/iembs.2010.5626589

- 663 Noyce, A. L., Cestero, N., Michalka, S. W., Shinn-Cunningham, B. G., & Somers, D. C.,  
664 2017. Sensory-Biased and Multiple-Demand Processing in Human Lateral Frontal Cortex.  
665 *The Journal of Neuroscience*, 37(36), 8755-8766. doi:10.1523/jneurosci.0660-17.2017
- 666 Olds, C., Pollonini, L., Abaya, H., Larky, J., Loy, M., Bortfeld, H., Oghalai, J. S., 2016.  
667 Cortical Activation Patterns Correlate with Speech Understanding After Cochlear  
668 Implantation. *Ear and Hearing*, 37(3). doi:10.1097/aud.0000000000000258
- 669 O'sullivan, J.A., Power, A.J., Mesgarani, N., Rajaram, S., Foxe, J.J., Shinn-Cunningham,  
670 B.G., Slaney, M., Shamma, S.A. and Lalor, E.C., 2014. Attentional selection in a cocktail  
671 party environment can be decoded from single-trial EEG. *Cerebral Cortex*, 25(7), pp.1697-  
672 1706.
- 673 Papesh, M.A., Folmer, R.L. and Gallun, F.J., 2017. Cortical measures of binaural  
674 processing predict spatial release from masking performance. *Frontiers in human*  
675 *neuroscience*, 11, p.124.
- 676 Patterson, R.D. & Holdsworth, J., 1996. A functional model of neural activity patterns and  
677 auditory images. *Advances in speech, hearing and language processing*, 3(Part B), pp.547-  
678 563.
- 679 Pei, Y., Wang, Z., & Barbour, R. L., 2007. "NAVI-SciPort solution: a problem solving  
680 environment (PSE) for nirs data analysis," in Poster at Human Brain Mapping, Chicago, IL.
- 681 Pollonini, L., Olds, C., Abaya, H., Bortfeld, H., Beauchamp, M. S., & Oghalai, J. S., 2014.  
682 Auditory cortex activation to natural speech and simulated cochlear implant speech  
683 measured with functional near-infrared spectroscopy. *Hearing Research*, 309, 84-93.  
684 doi:10.1016/j.heares.2013.11.007
- 685 Scott, S. K., Rosen, S., Wickham, L., & Wise, R. J., 2004. A positron emission tomography  
686 study of the neural basis of informational and energetic masking effects in speech  
687 perception. *The Journal of the Acoustical Society of America*, 115(2), 813-821.  
688 doi:10.1121/1.1639336 Scott, S. K., Rosen, S., Beaman, C. P., Davis, J. P., & Wise, R. J.,  
689 2009. The neural processing of masked speech: Evidence for different mechanisms in the  
690 left and right temporal lobes. *The Journal of the Acoustical Society of America*, 125(3),  
691 1737-1743. doi:10.1121/1.3050255 Shinn-Cunningham, B. G., Ihlefeld, A., Satyavarta, and

- 692 Larson, E. 2005. Bottom-up and topdown influences on spatial unmasking. *Acta Acustica*  
693 91, 967-979.
- 694 Shinn-Cunningham, B.G., 2008. Object-based auditory and visual attention. *Trends in*  
695 *cognitive sciences*, 12(5), pp.182-186.
- 696 Shinn-Cunningham, B.G. and Best, V., 2008. Selective attention in normal and impaired  
697 hearing. *Trends in amplification*, 12(4), pp.283-299. Shomstein, S. and Yantis, S., 2006.  
698 Parietal cortex mediates voluntary control of spatial and nonspatial auditory attention.  
699 *Journal of Neuroscience*, 26(2), pp.435-439.
- 700 Talairach, J., Rayport, M., & Tournoux, P., 1988. Co-planar stereotaxic atlas of the human  
701 brain: 3-dimensional proportional system: An approach to cerebral imaging. Stuttgart:  
702 Thieme.
- 703 Thomason, M. E., Foland, L. C., & Glover, G. H., 2006. Calibration of BOLD fMRI using  
704 breath holding reduces group variance during a cognitive task. *Human Brain Mapping*,  
705 28(1), 59-68. doi:10.1002/hbm.20241
- 706 van de Rijt, L.P., van Opstal, A.J., Mylanus, E.A., Straatman, L.V., Hu, H.Y., Snik, A.F. and  
707 van Wanrooij, M.M., 2016. Temporal cortex activation to audiovisual speech in normal-  
708 hearing and cochlear implant users measured with functional near-infrared spectroscopy.  
709 *Frontiers in human neuroscience*, 10, p.48.
- 710 Wack, D. S., Cox, J. L., Schirda, C. V., Magnano, C. R., Sussman, J. E., Henderson, D., &  
711 Burkard, R. F., 2012. Functional Anatomy of the Masking Level Difference, an fMRI Study.  
712 *PLoS ONE*, 7(7). doi:10.1371/journal.pone.0041263
- 713 Wiggins, I.M., Wijayasiri, P. and Hartley, D., 2016a. Shining a light on the neural signature  
714 of effortful listening. *The Journal of the Acoustical Society of America*, 139(4), pp.2074-  
715 2074.
- 716 Wiggins, I.M., Anderson, C.A., Kitterick, P.T. and Hartley, D.E., 2016b. Speech-evoked  
717 activation in adult temporal cortex measured using functional near-infrared spectroscopy  
718 (fNIRS): Are the measurements reliable?. *Hearing research*, 339, pp.142-154.

- 719 Wijayasiri, P., Hartley, D.E. and Wiggins, I.M., 2017. Brain activity underlying the recovery  
720 of meaning from degraded speech: A functional near-infrared spectroscopy (fNIRS) study.  
721 *Hearing research*, 351, pp.55-67.
- 722 Wong, W. Y., & Stapells, D. R., 2004. Brain Stem and Cortical Mechanisms Underlying the  
723 Binaural Masking Level Difference in Humans: An Auditory Steady-State Response Study.  
724 *Ear and Hearing*, 25(1), 57-67. doi:10.1097/01.aud.0000111257.11898.64
- 725 Wu, C., Weissman, D., Roberts, K., & Woldorff, M., 2007. The neural circuitry underlying  
726 the executive control of auditory spatial attention. *Brain Research*, 1134, 187-198.  
727 doi:10.1016/j.brainres.2006.11.088
- 728 Xia, J., Kalluri, S., Micheyl, C. and Hafter, E., 2017. Continued search for better prediction  
729 of aided speech understanding in multi-talker environments. *The Journal of the Acoustical*  
730 *Society of America*, 142(4), pp.2386-2399.
- 731 Yoshitani, K., Kawaguchi, M., Miura, N., Okuno, T., Kanoda, T., Ohnishi, Y., & Kuro, M.,  
732 2007. Effects of Hemoglobin Concentration, Skull Thickness, and the Area of the  
733 Cerebrospinal Fluid Layer on Near-infrared Spectroscopy Measurements. *Anesthesiology*,  
734 106(3), 458-462. doi:10.1097/00000542-200703000-00009
- 735 Zatorre, R. J., Mondor, T. A., & Evans, A. C., 1999. Auditory Attention to Space and  
736 Frequency Activates Similar Cerebral Systems. *NeuroImage*, 10(5), 544-554.  
737 doi:10.1006/nimg.1999.0491
- 738

739 **FIGURE CAPTIONS**

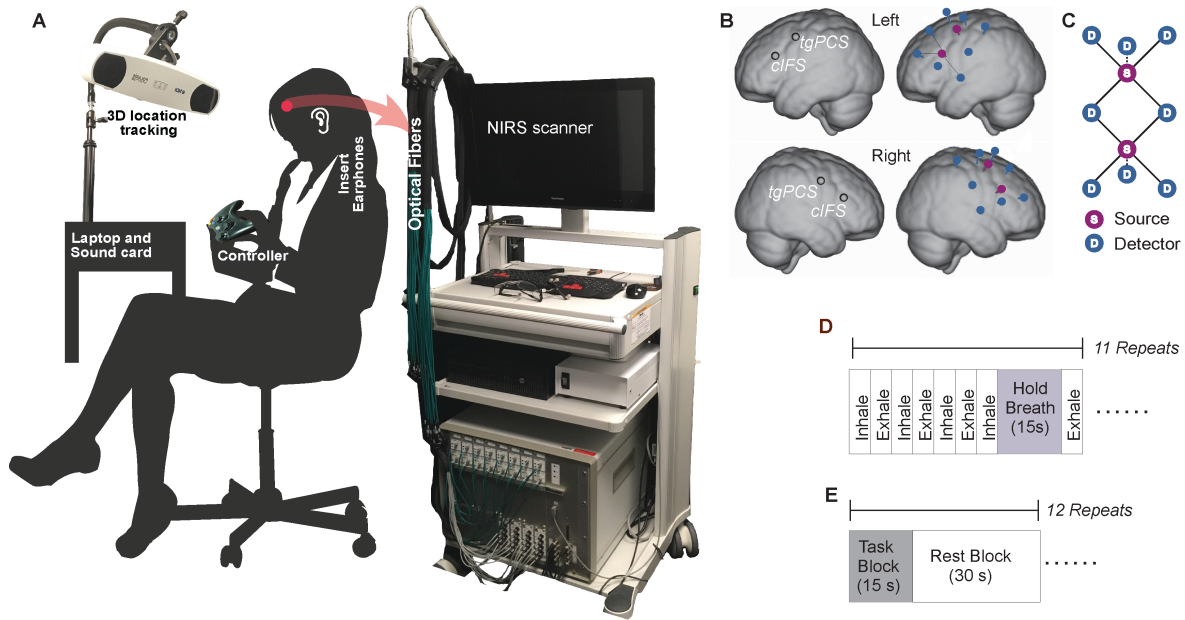

740

741 **Figure 1**

742 A) Experimental apparatus and setup. B) ROIs and optode placement for a  
743 representative listener. Blue circles show placements of detector optodes, red  
744 circles of source optodes. C) fNIRS optical probes design with deep neurovascular  
745 (solid line) and shallow nuisance (dotted line) channels. S: source. D: detector. D)  
746 Block design, Controlled breathing task E) Block design, Auditory task.

747

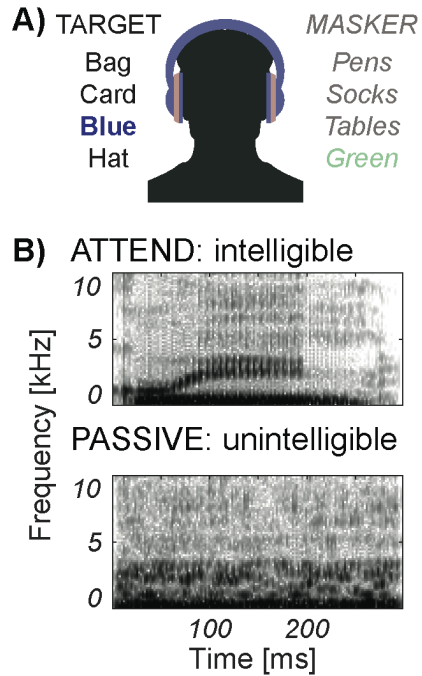

748

749 **Figure 2**

750 A) Speech paradigm. B) Spectrograms of the word “green.” Unprocessed speech in  
751 the ATTEND condition (top) and scrambled speech in the PASSIVE condition  
752 (bottom).

753

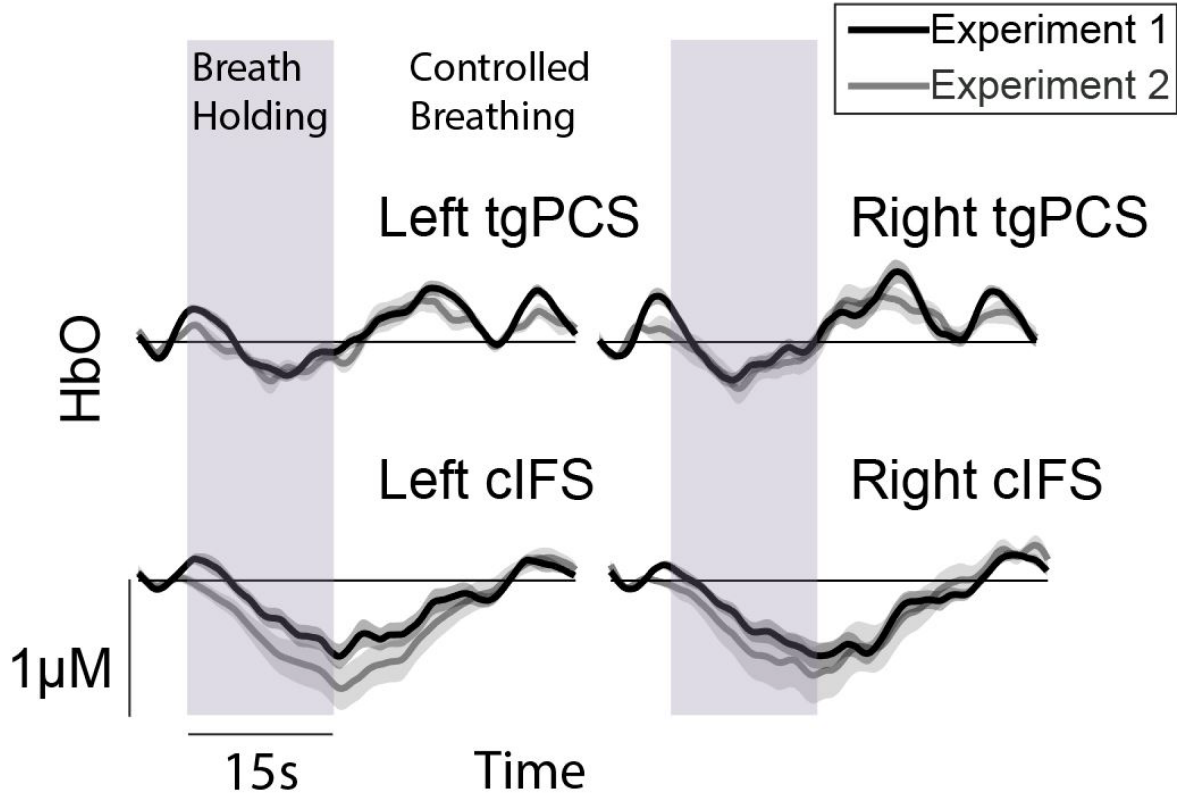

754

755 **Figure 3**

756 HbO concentration change during controlled breathing in experiments 1 and 2.

757

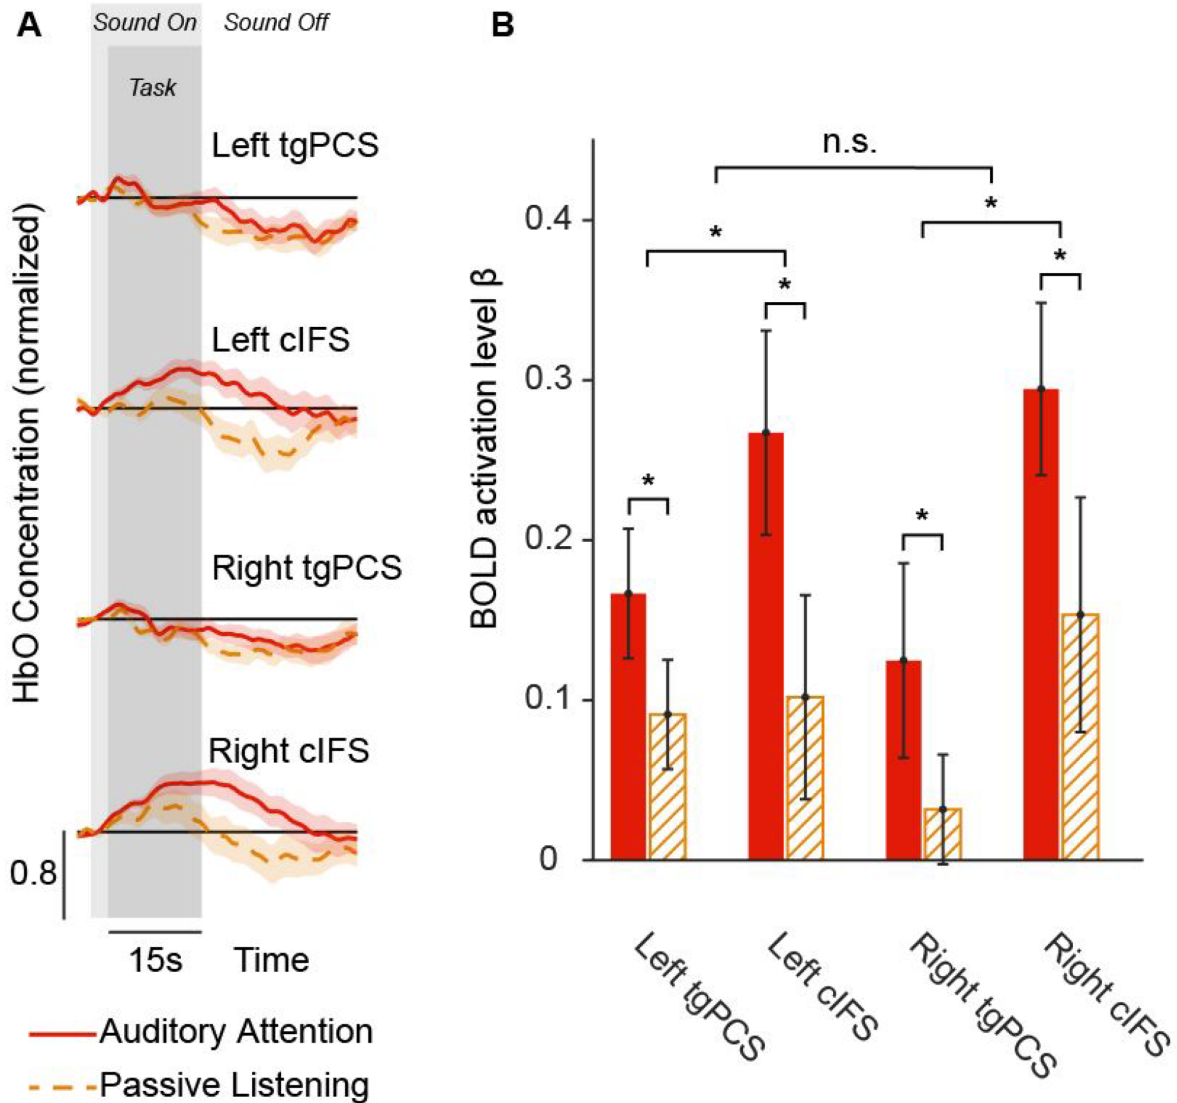

758

759 **Figure 4**

760 Results from experiment 1. A) Normalized HbO traces during the direction of

761 auditory attention versus passive listening, at each of the four ROIs in experiment

762 1. The ribbons around each trace show one standard error of the mean across



763 listeners. B) Normalized HbO traces during pitch and spatial cues condition versus  
764 pitch cue only condition, at each of the four ROIs in experiment 2. The ribbons  
765 around each trace show one standard error of the mean across listeners. BOLD  
766 activation levels  $\beta$ , error bars show one standard error of the mean.  
767

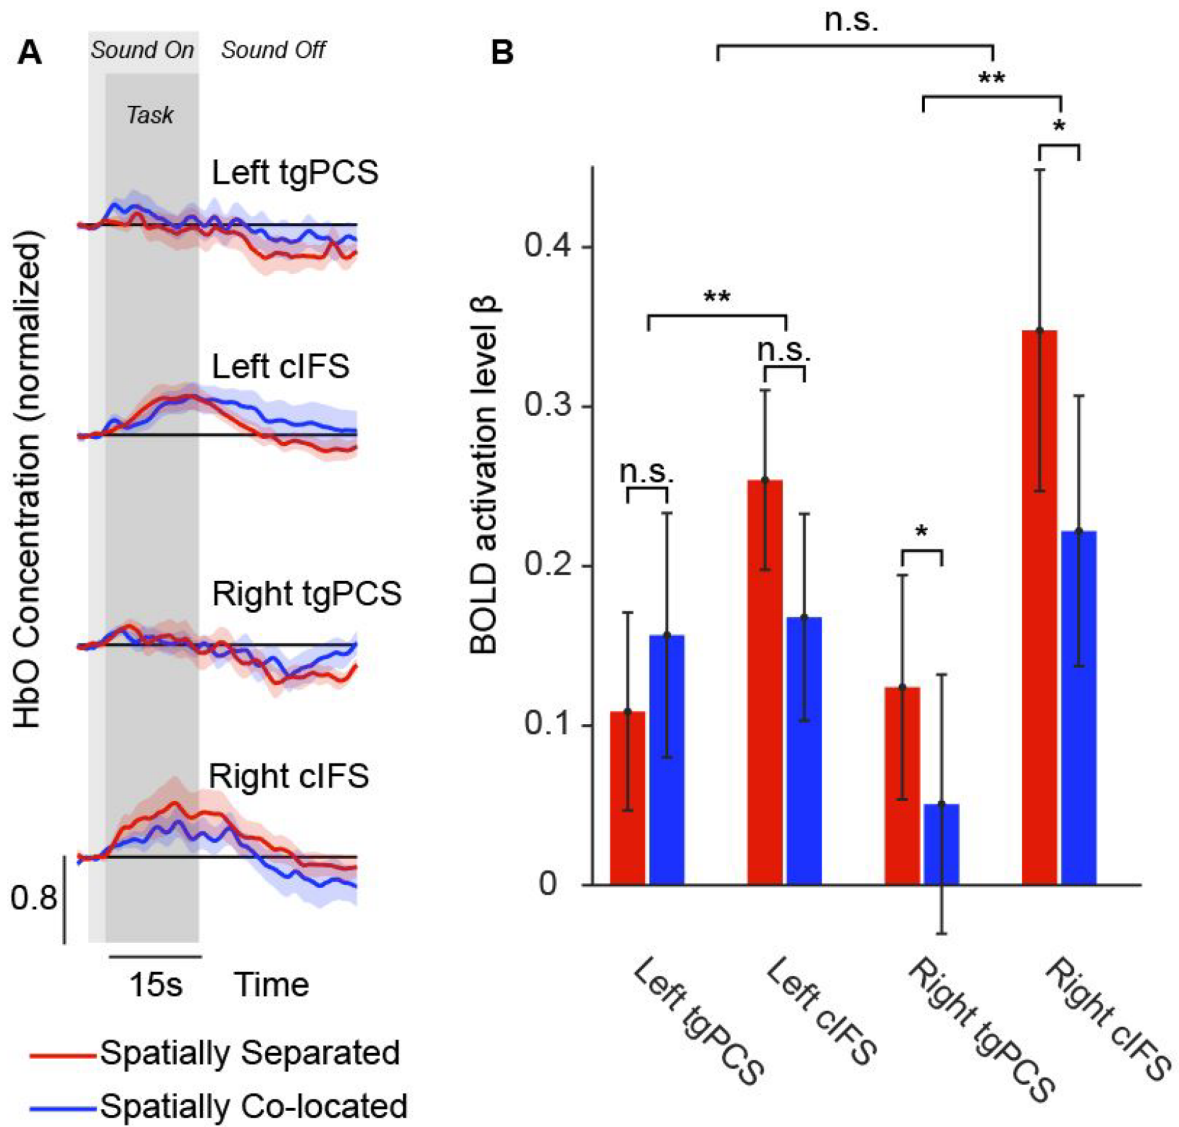

768

769 **Figure 5**

770 Results from experiment 2, formatting similar to Figure 4.

771

772

773

774
